# Supplementary material
Source: publisher figshare collection journal article supplement (https://acs.figshare.com/ndownloader/files/5135899)
Supplement: Supplementary file 1 [file 5135899]

## SUPPORTING INFORMATION

**S2:** General experimental methods

**S3:**  $^1\text{H}$  NMR of compound **5b**

**S4:**  $^{13}\text{C}$  NMR of compound **5b**

**S5:**  $^1\text{H}$  NMR of compound **5c**

**S6:**  $^{13}\text{C}$  NMR of compound **5c**

**S7:**  $^1\text{H}$  NMR of compound **9**

**S8:**  $^{13}\text{C}$  NMR of compound **9**

**S9:**  $^1\text{H}$  NMR of compound **10**

**S10:**  $^{13}\text{C}$  NMR of compound **10**

**S11:**  $^1\text{H}$  NMR of compound **6bI**

**S12:**  $^{13}\text{C}$  NMR of compound **6bI**

**S13:**  $^1\text{H}$  NMR of compound **6bII**

**S14:**  $^{13}\text{C}$  NMR of compound **6bII**

**S15:**  $^1\text{H}$  NMR of compounds **6aI** and **6aII**

**S16:**  $^{13}\text{C}$  NMR of compounds **6aI** and **6aII**

**S17:**  $^1\text{H}$  NMR of compounds **7dI** and **7dII**

**S18:**  $^1\text{H}$  NMR of compounds **7eI** and **7eII**

**S19:**  $^1\text{H}$  NMR of compounds **11** and **12**

**S20:**  $^1\text{H}$  NMR of compound **13**

**S21:**  $^{13}\text{C}$  NMR of compound **13**

**S22:** Energy and Cartesian coordinates for structure **5a(H<sup>+</sup>)A**

**S23:** Energy and Cartesian coordinates for structure **5a(H<sup>+</sup>)B**

**S24:** Energy and Cartesian coordinates for structure **5d(H<sup>+</sup>)A**

**S25:** Energy and Cartesian coordinates for structure **5d(H<sup>+</sup>)B**

### General experimental methods

$^1\text{H}$  and  $^{13}\text{C}$  NMR were recorded at 300 (or 500) and 75 (or 125) MHz respectively. MS spectra were recorded on a chromatograph equipped with a MS capillary column (30 m x 0.25 mm i.d. x 0.25  $\mu\text{m}$  film thickness; injection temperature: 250°C, column temperature program: 100°C for 3 min, then 10°C min<sup>-1</sup> until 250°C) and a mass selective detector (mass range: 15-800 a.m.u.; scan rate: 1.9 scans s<sup>-1</sup>; EM voltage: 1435). Commercially available reagents were used without further purification. All reactions were monitored by TLC with silica gel-coated plates. Column chromatography was carried out using 60-240 mesh silica gel at atmospheric pressure.

### General procedure for the synthesis of epoxides 5(a-d), 9 and 10.

NaOH (7.1 mL of 50% aqueous solution) was added dropwise at 0°C to a stirred solution of benzyldimethylsulfonium chloride (1.3 equiv., 10.5 mmol), the appropriate aldehyde (1 equiv.) and tetrabutylammonium hydrogensulfate (0.05 equiv.) in  $\text{CH}_2\text{Cl}_2$  (15 mL). After 5h the reaction is quenched and worked up as usual.<sup>13</sup>

**General procedure for the LiBr opening of (*E*)-2,3-diaryloxiranes.** To a solution of the epoxide (0.50 mmol) in 10 mL of acetonitrile, kept at the desired temperature, were added solid LiBr (2-4 equiv.) and Amberlyst 15 (220-440 mg/mmol) consecutively in single portions. The mixture was stirred at the desired temperature and monitored by TLC until complete. The mixture was filtered and the filtrate was evaporated under vacuum. The residue was dissolved in  $\text{Et}_2\text{O}$  and the resulting organic layer was dried with  $\text{Na}_2\text{SO}_4$ . The solvent was evaporated under vacuum and the crude product was analyzed by NMR.

**General procedure for the alkali ring closure of bromohydrins mixtures.** To a solution of the bromohydrins (0.10 mmol) in 2 mL of anhydrous THF, kept at 0°C, was added NaH (1.5 equiv.) in a single portion. The mixture was stirred and monitored by TLC until complete. The mixture was quenched by cold water and the organic layer extracted by  $\text{Et}_2\text{O}$ , dried with  $\text{Na}_2\text{SO}_4$ . The solvent was evaporated under vacuum and the crude product was analyzed by  $^1\text{H}$  NMR.

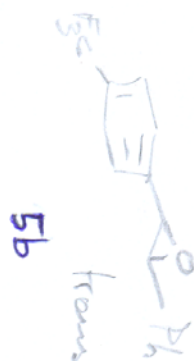

4-ferrocenyl-2-pentene

500 MHz

S1

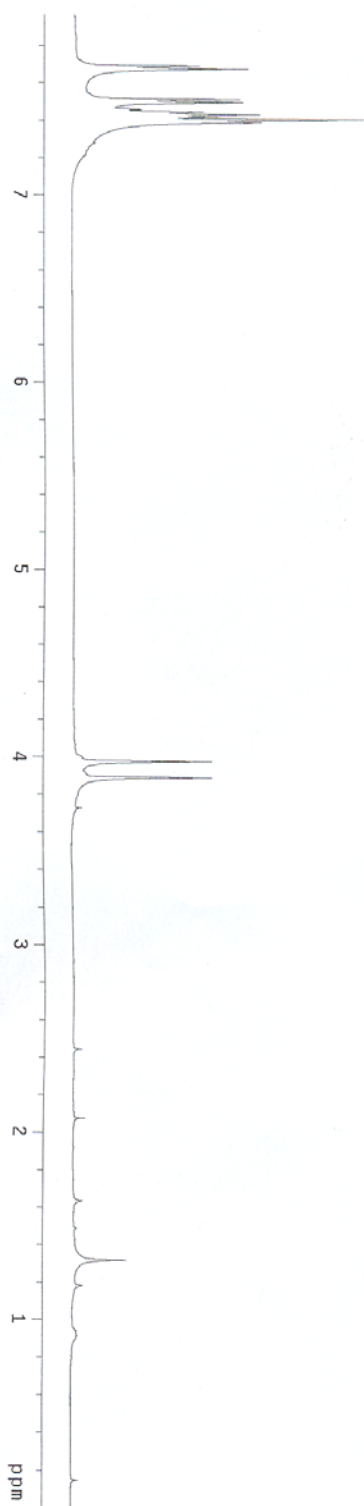

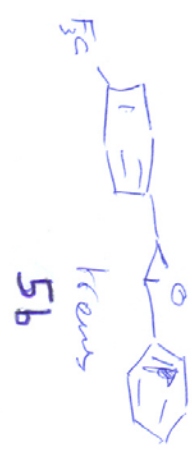

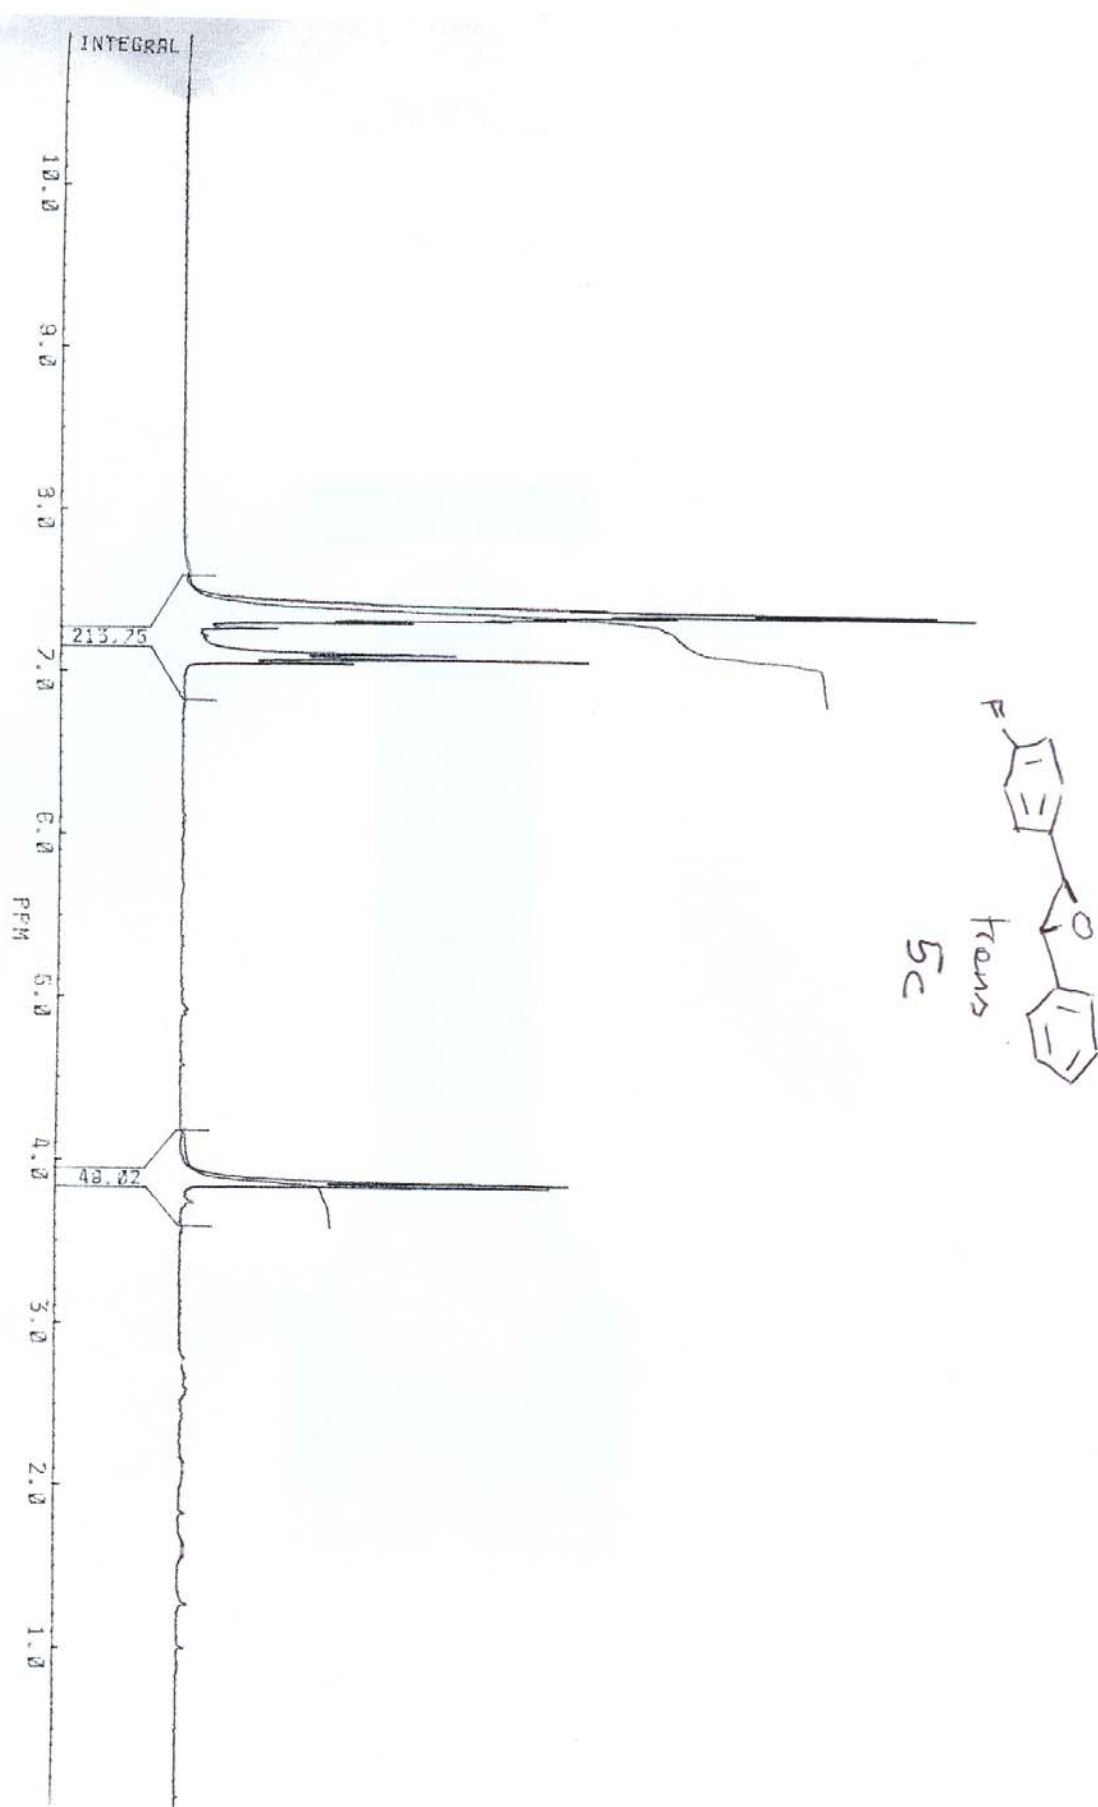

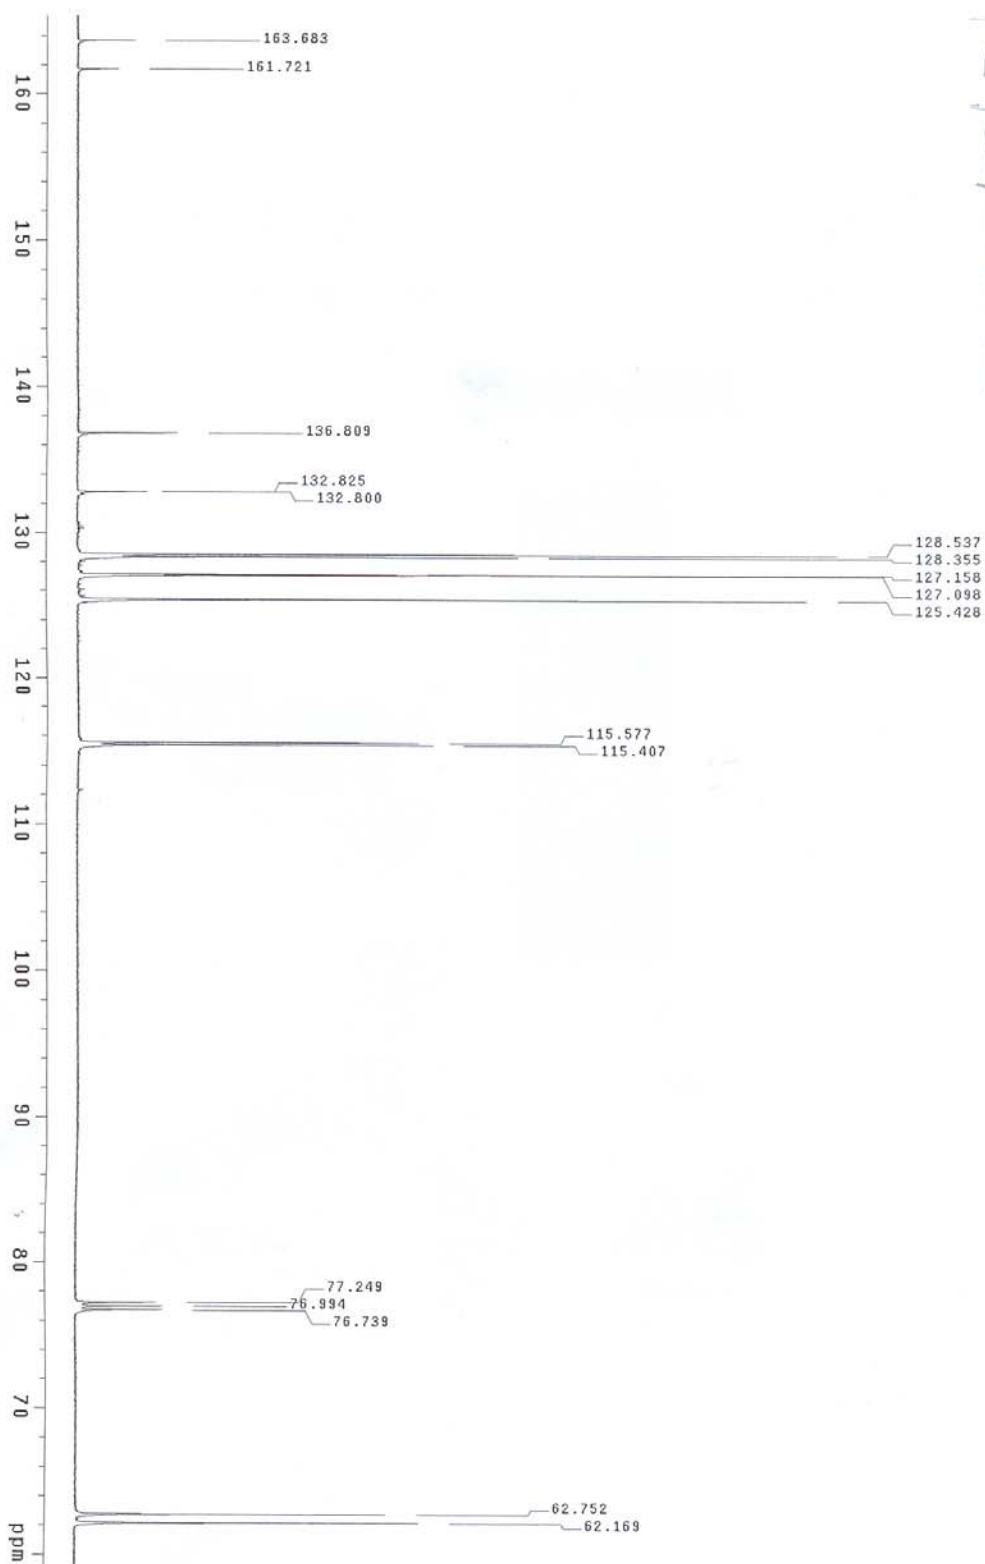

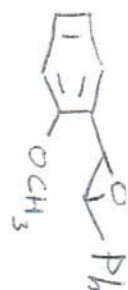

9

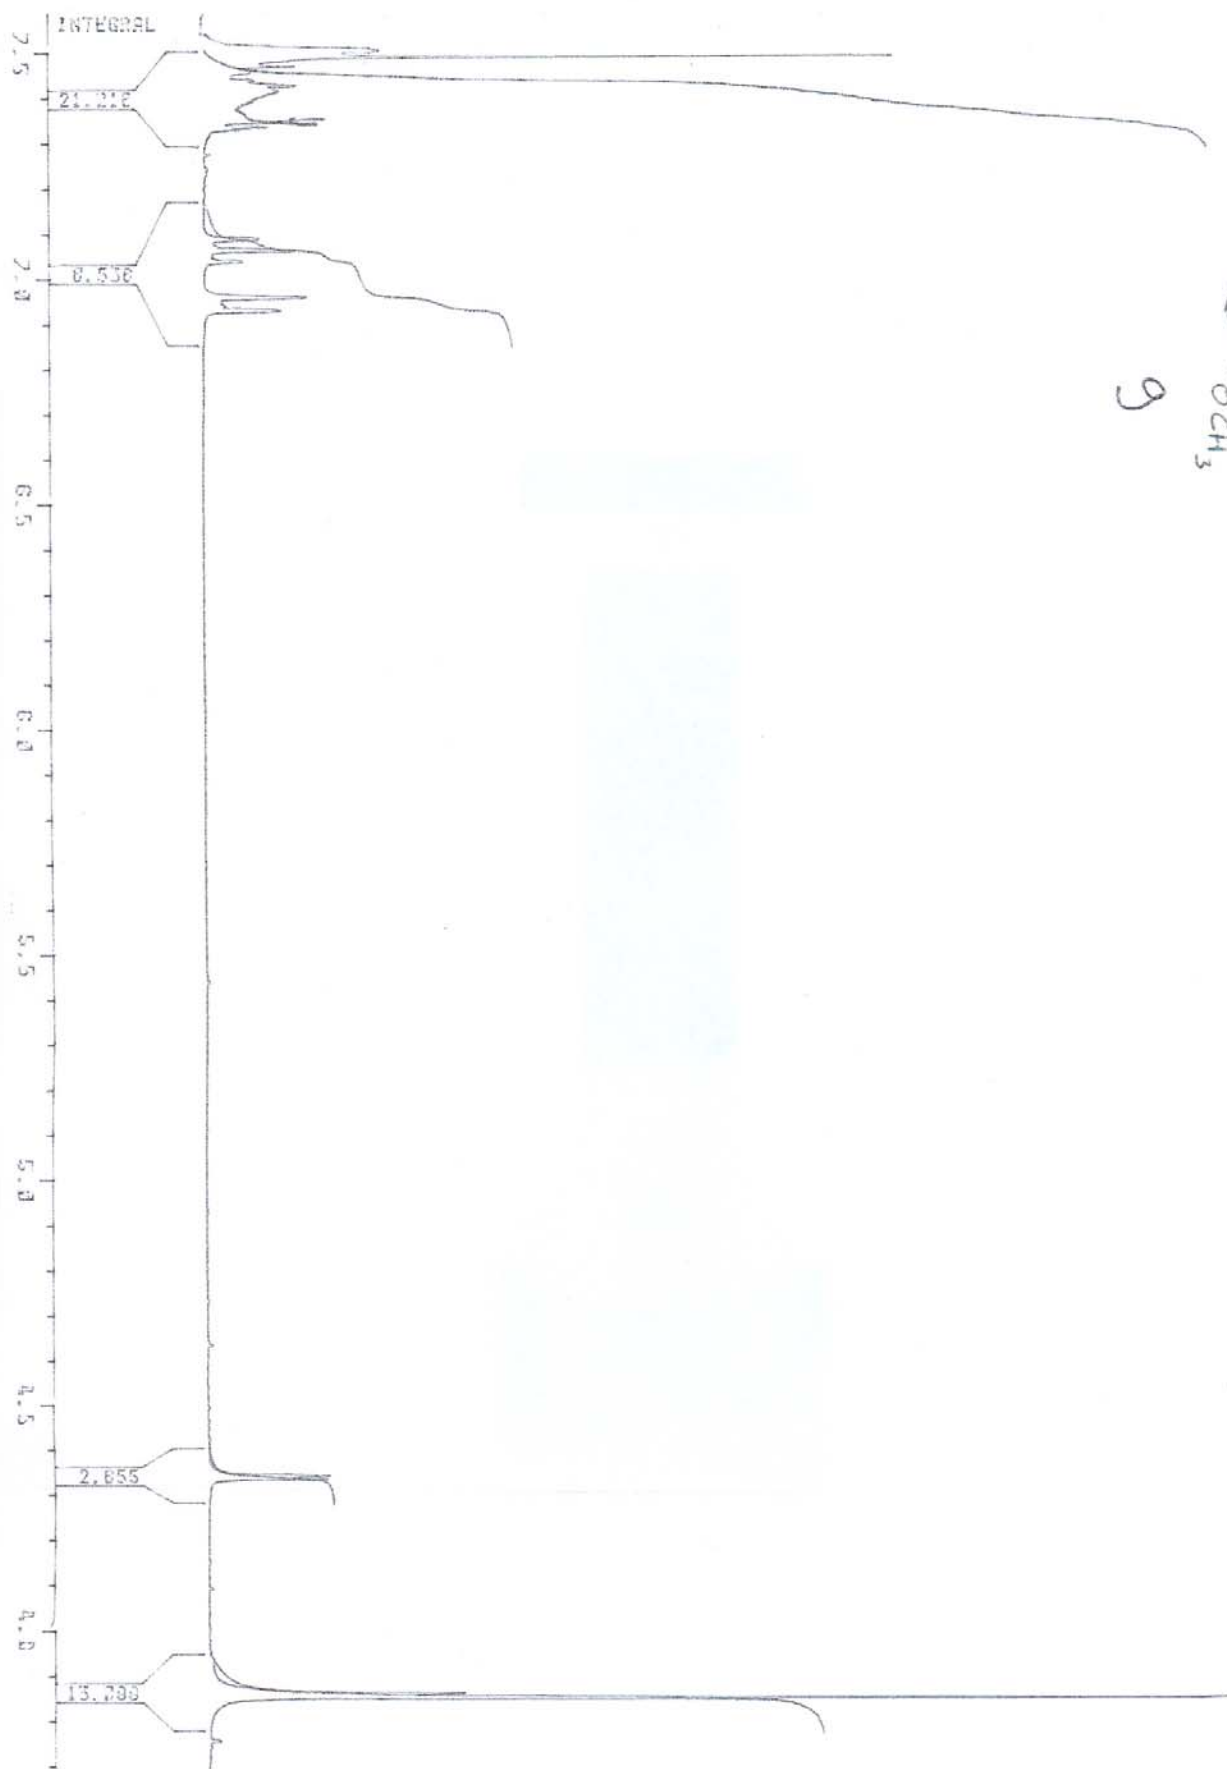

S5

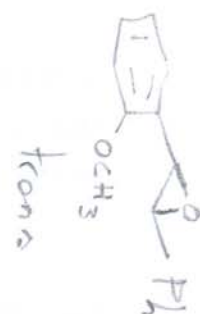

9

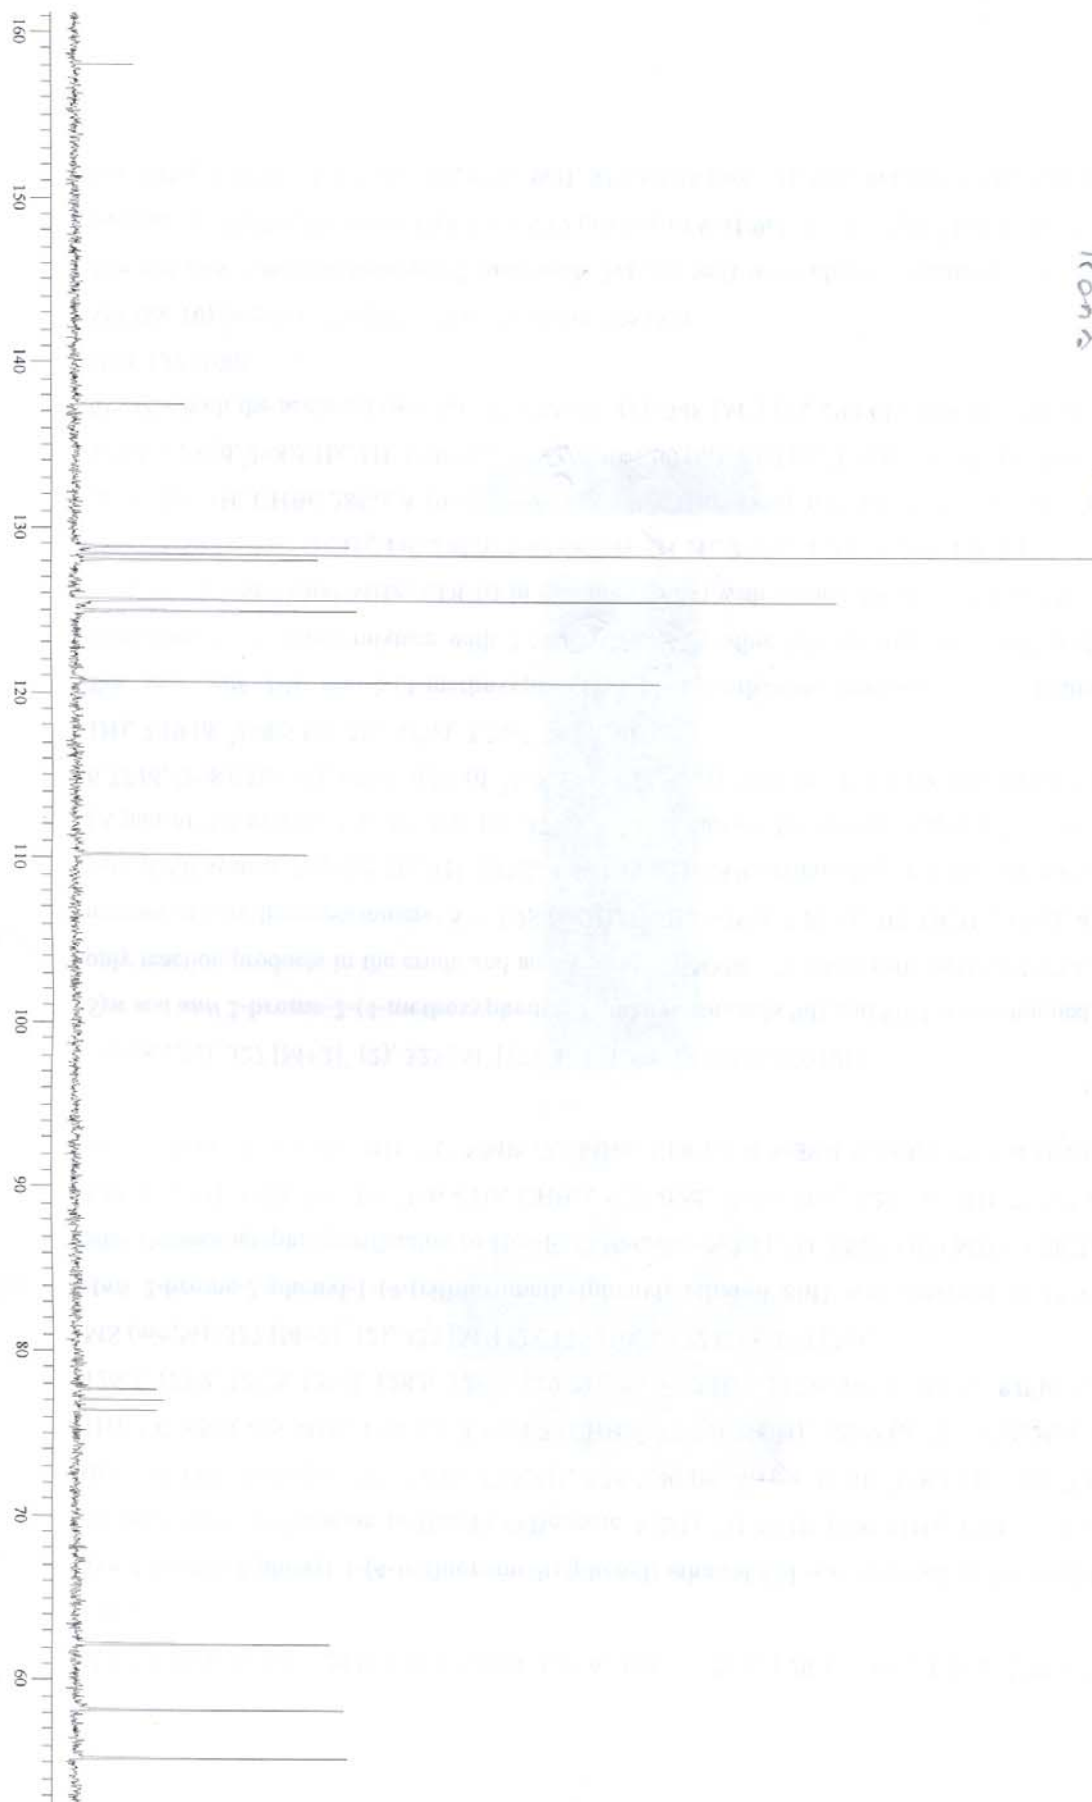

S6



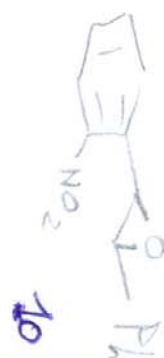

S7

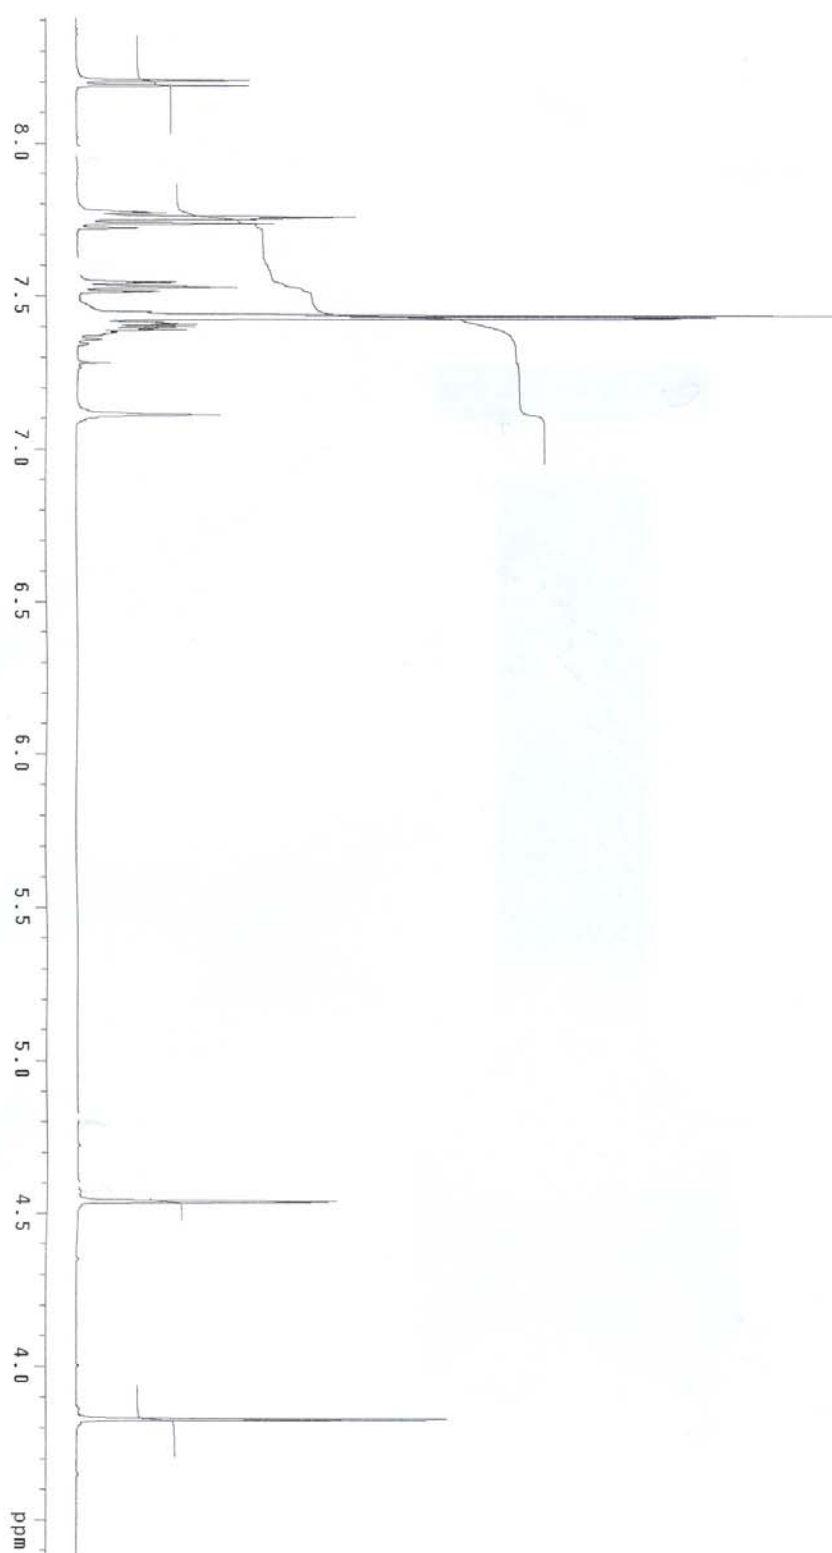

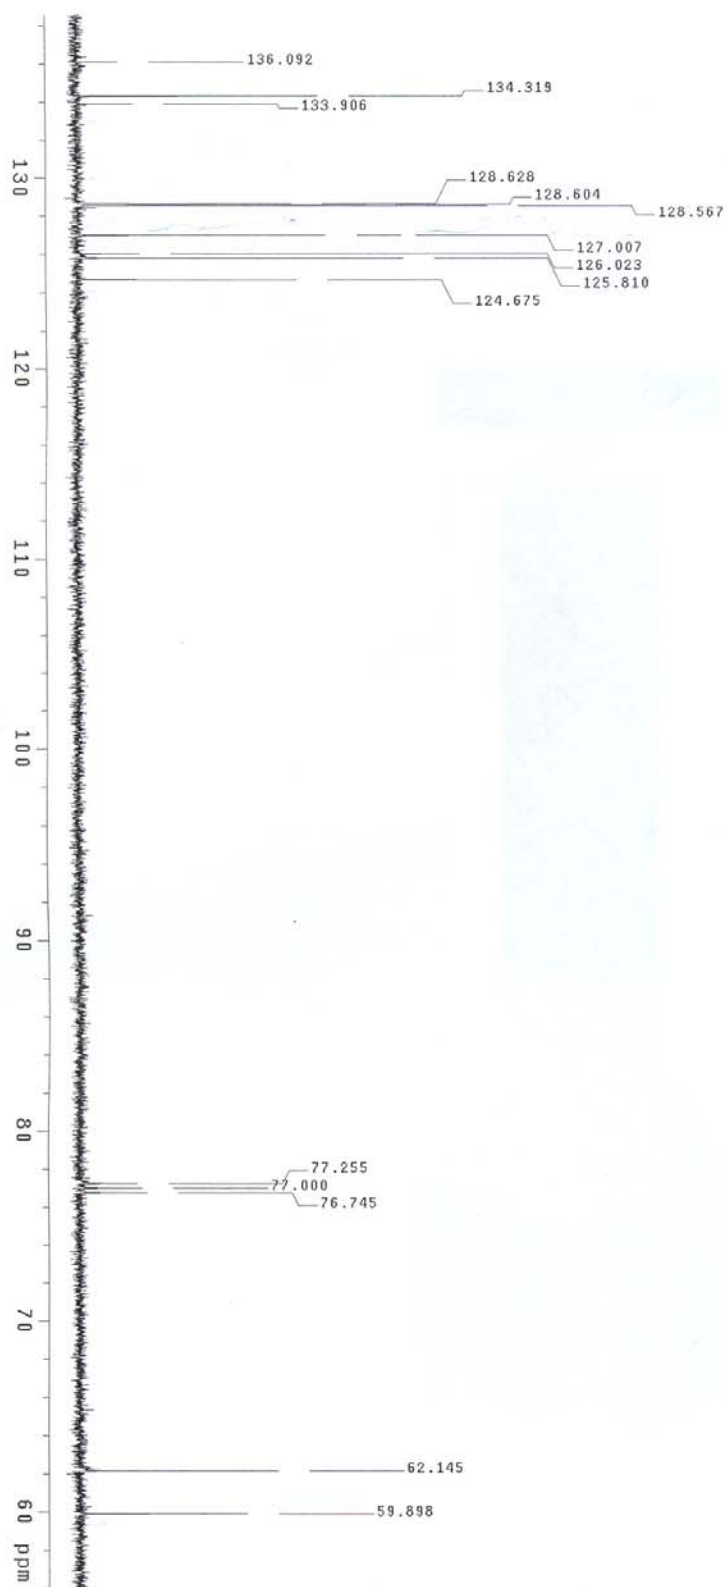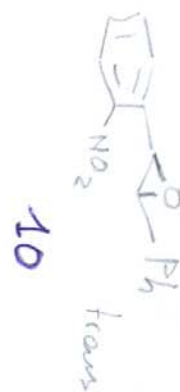

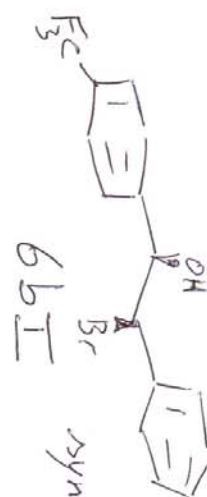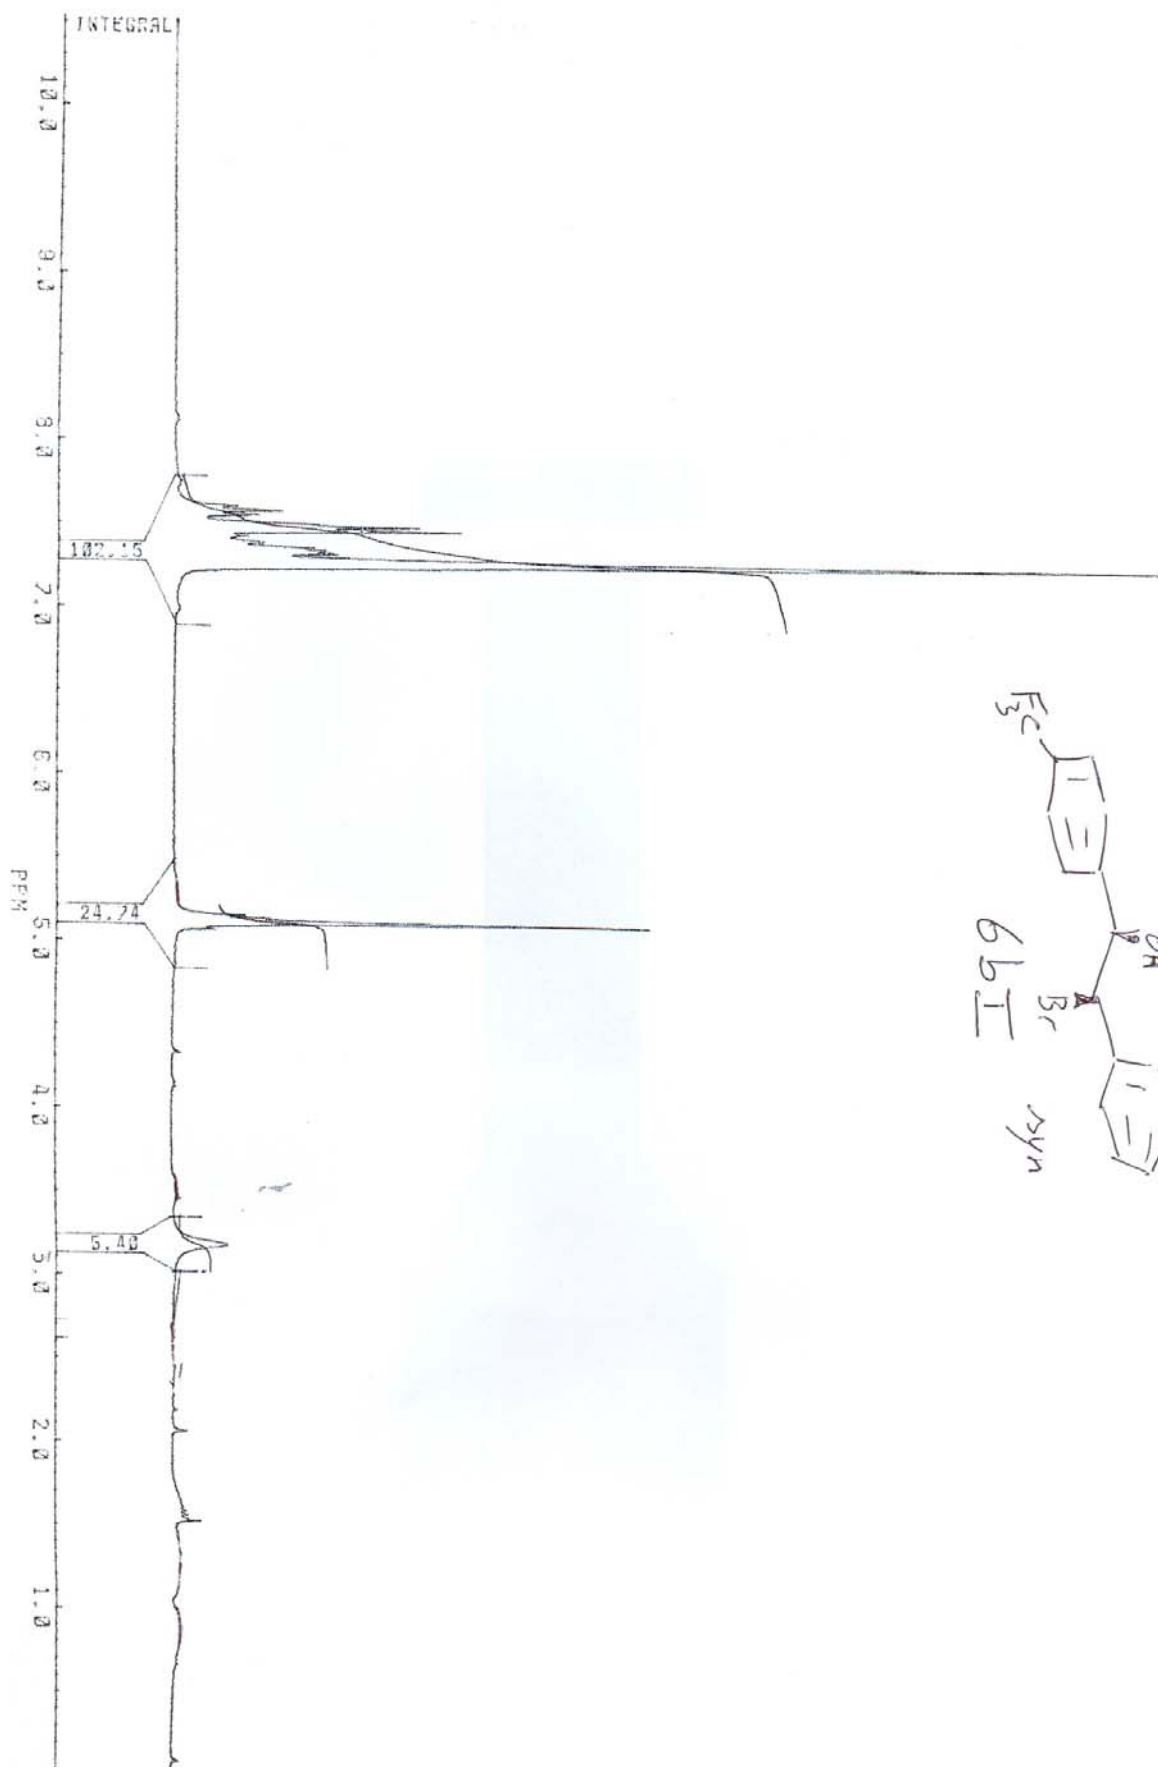

PCF<sub>3</sub>B<sub>1</sub>O<sub>4</sub>H  
40 µg P. 68

syn

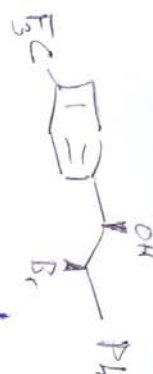

6bI

syn

S10

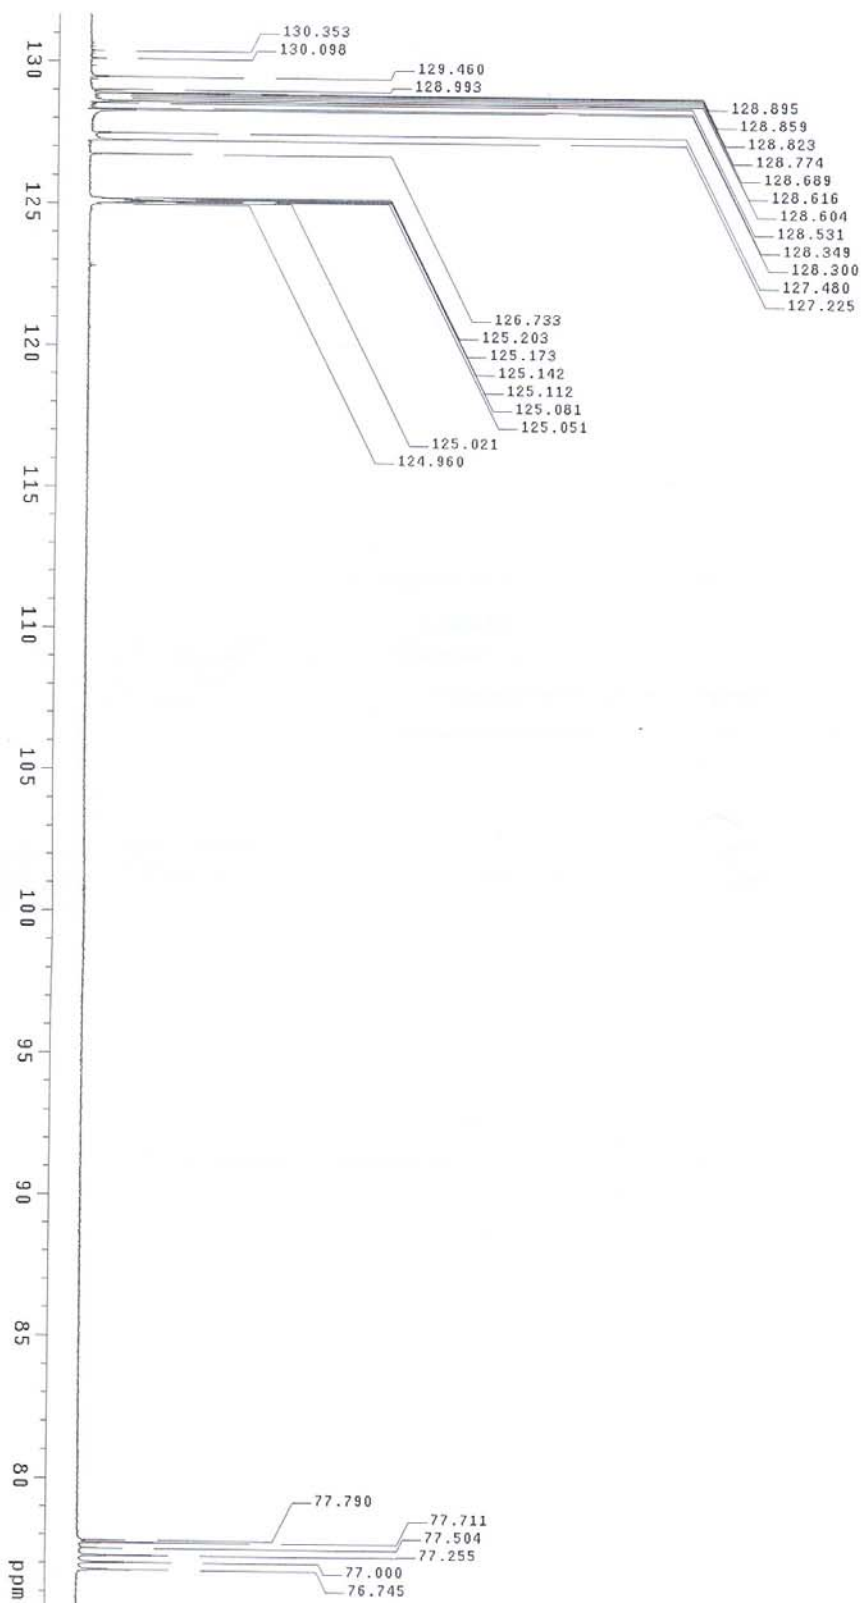

PCF<sub>3</sub> BrOH  
pH: 10.0  
pH: 10.0

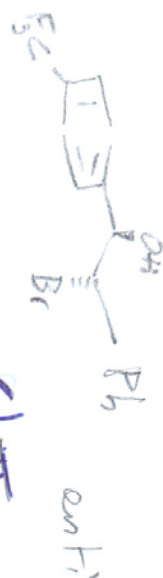

S-11

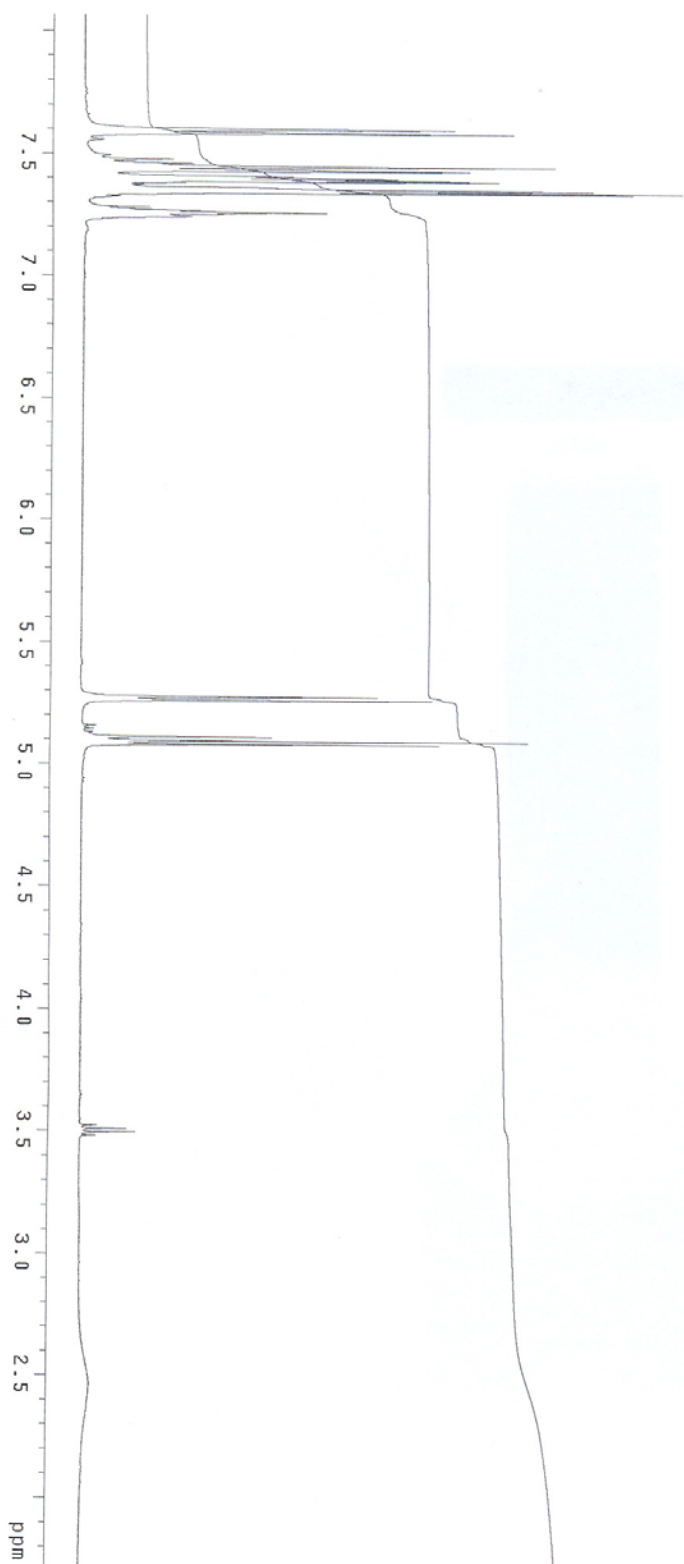

paolo  
Pulse Sequence: szpul  
Solvent: CDCl3  
Ambient temperature  
User: 1-14-87  
INOVA-500 "nmr500"

35 usg P. 68

Pulse 71.1 degrees  
Acq. time 1.300 sec  
Width 25000.0 Hz  
3840 repetitions  
OBSERVE C13, 125.6241707 MHz  
DECOUPLE H1, 499.5012287 MHz  
Power 33 db  
continuously on  
WALTZ16 modulated  
DATA PROCESSING  
File processing 0.5 Hz  
F1 124.65536  
Total time 36 hr, 22 min, 18 sec

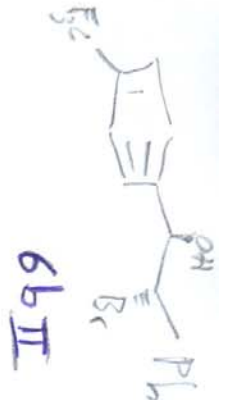

S12

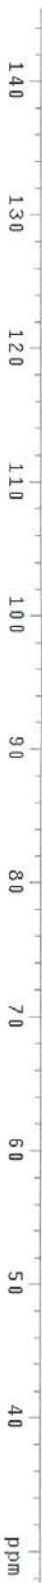

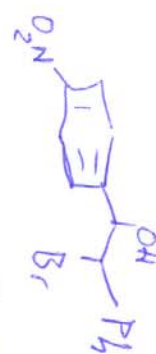

6aI and 6aII

S13

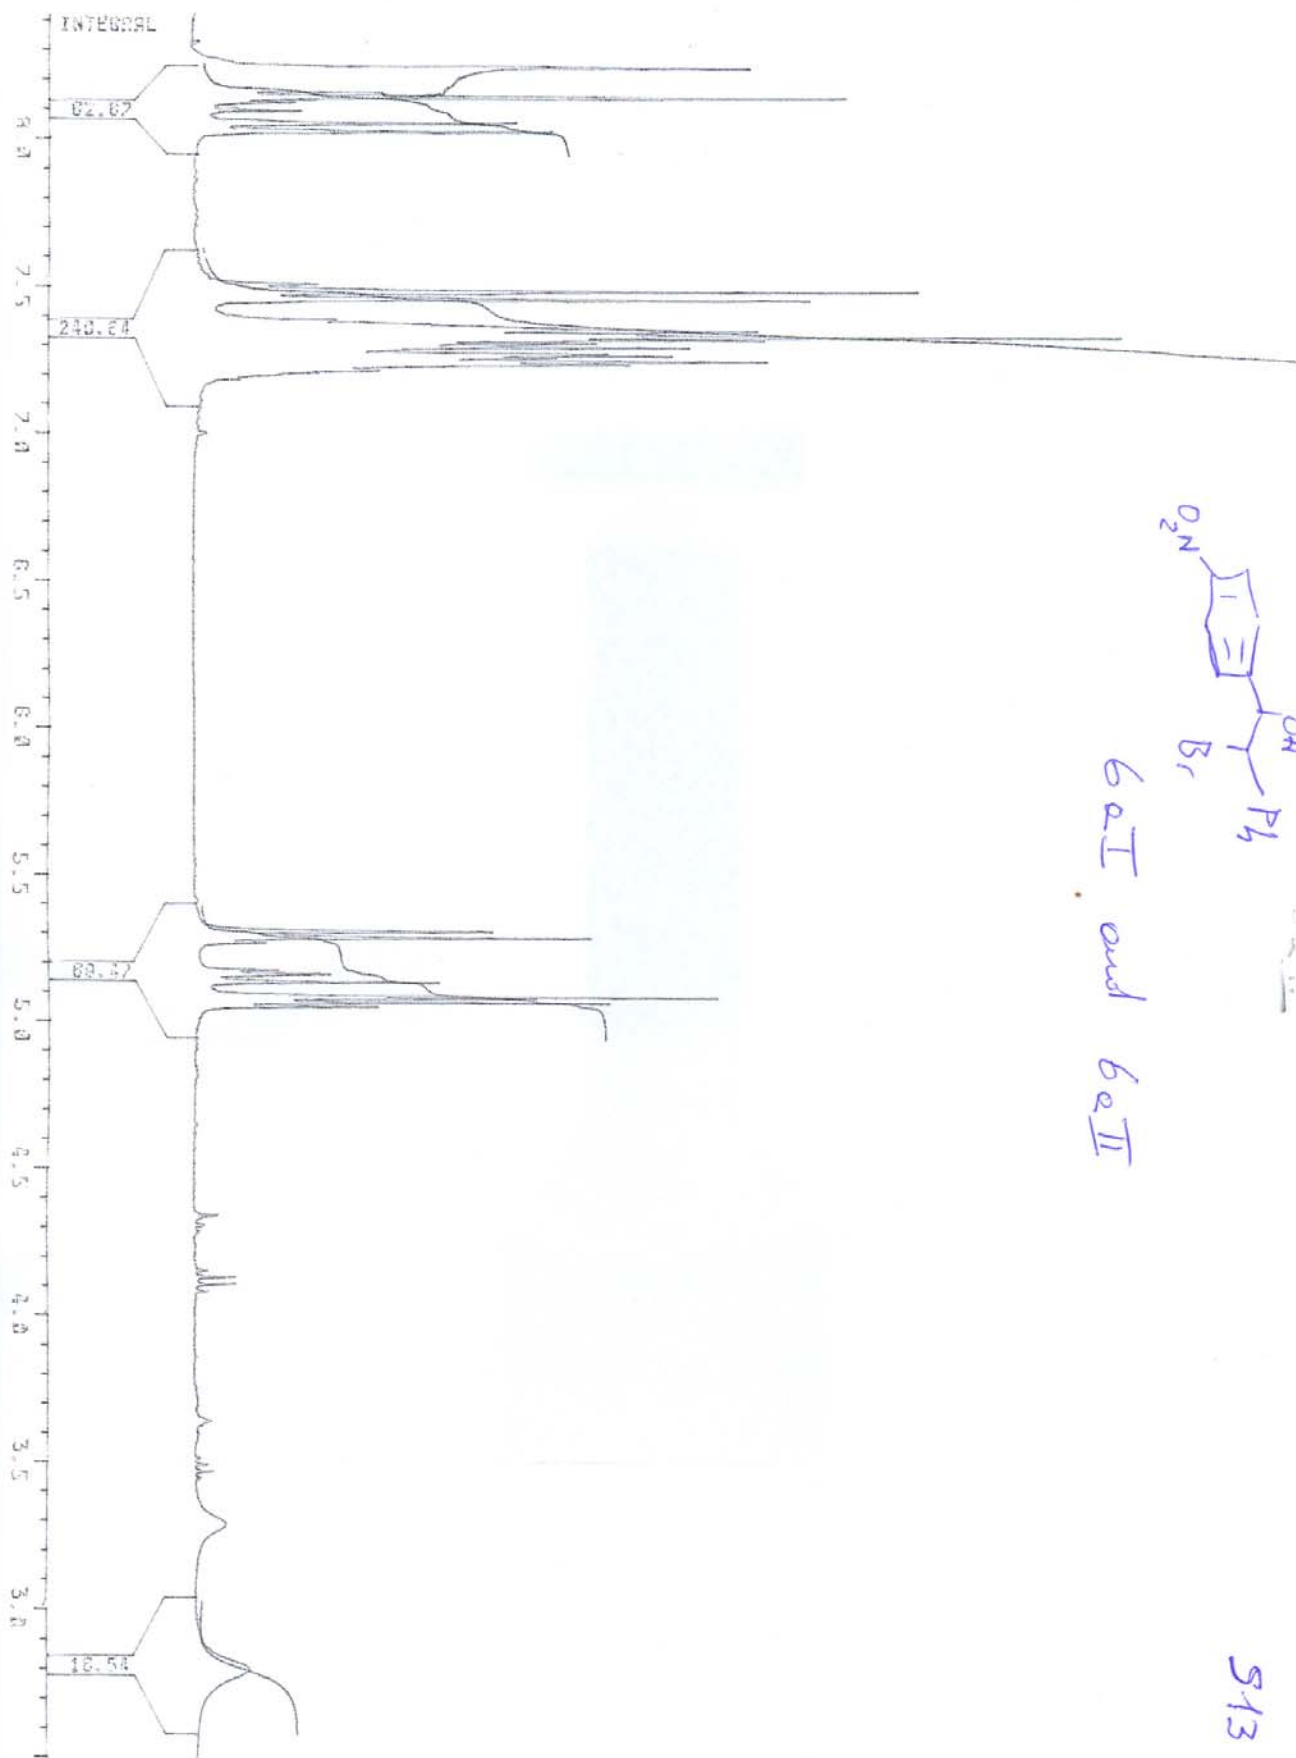

S14

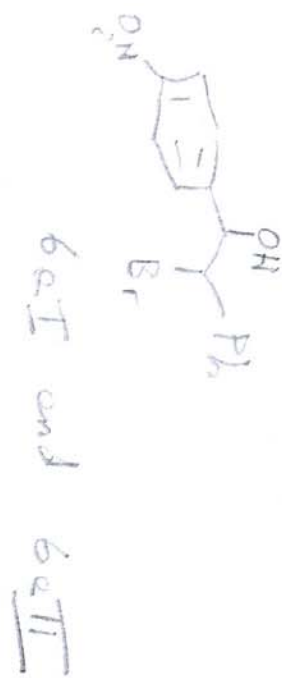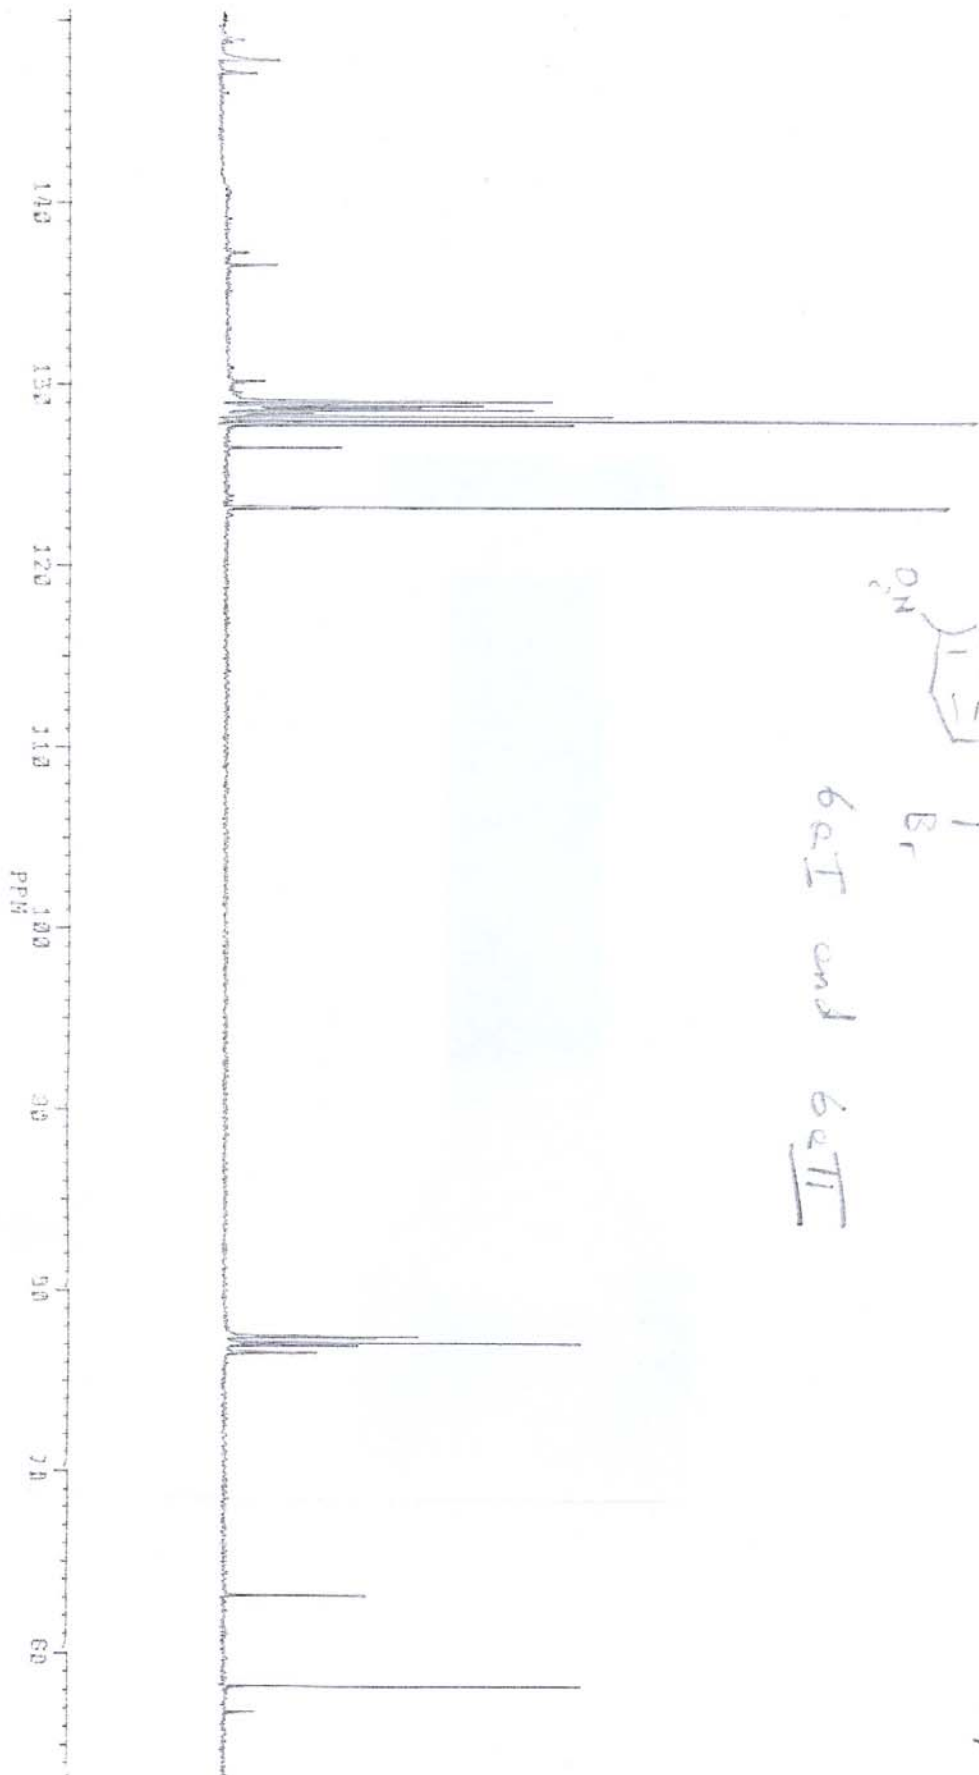



Pulse 65.5 degrees  
Acq. time 2.000 sec  
Width 8000.0 Hz  
56 repetitions  
OBSERVE H1, 499.5987306 MHz  
DATA PROCESSING  
FT size 32768  
Total time 2 min, 8 sec

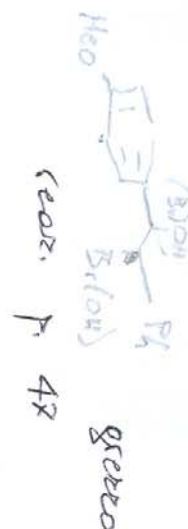

IIpZ and IPI

575

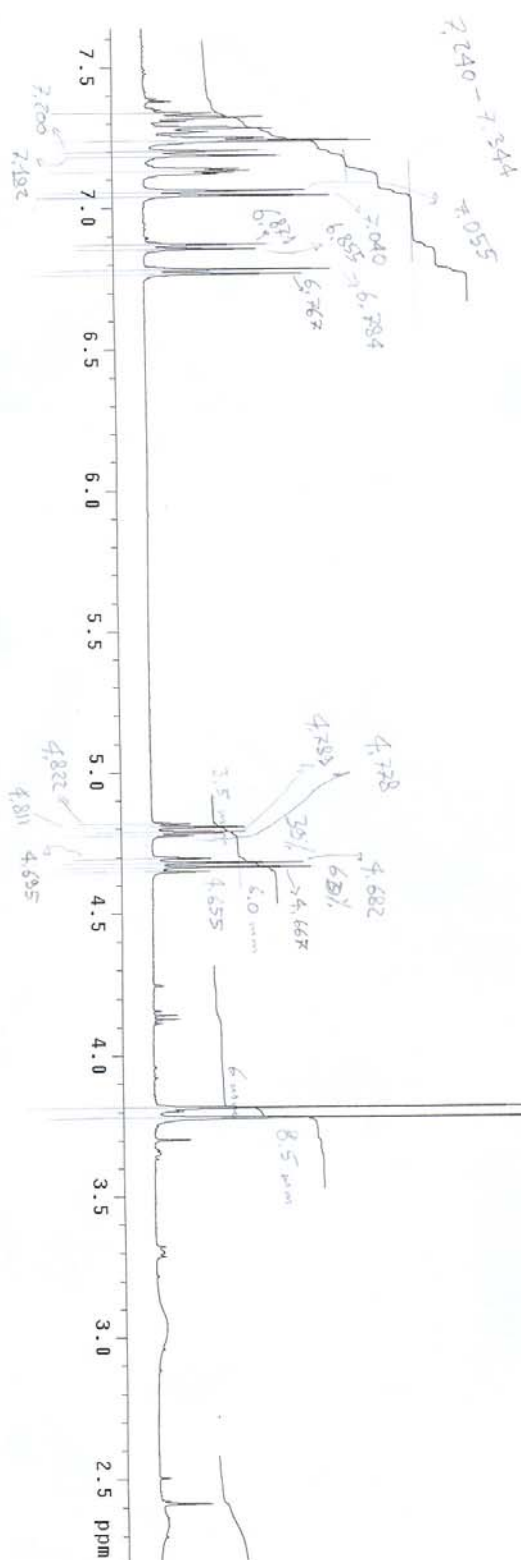

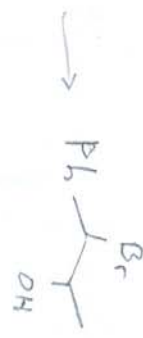
$$Z_{\text{el}} \quad \text{and} \quad Z_{\text{el}}^*$$

3-B-3-A-2-Propoxide 516

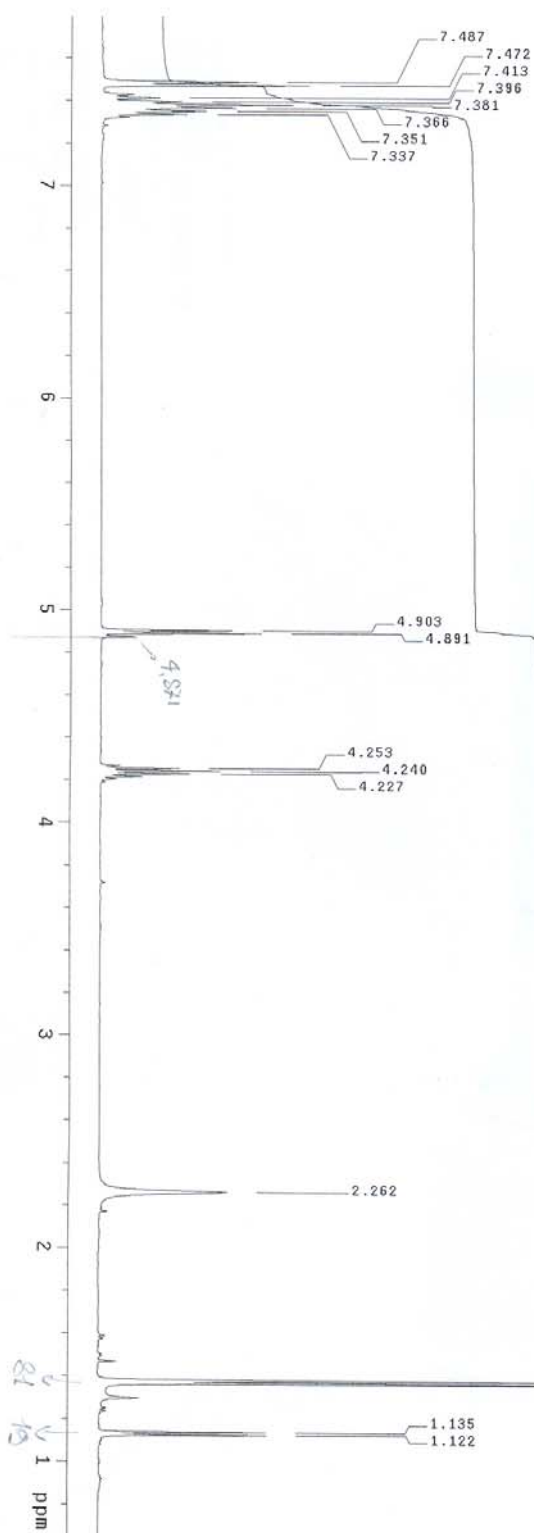

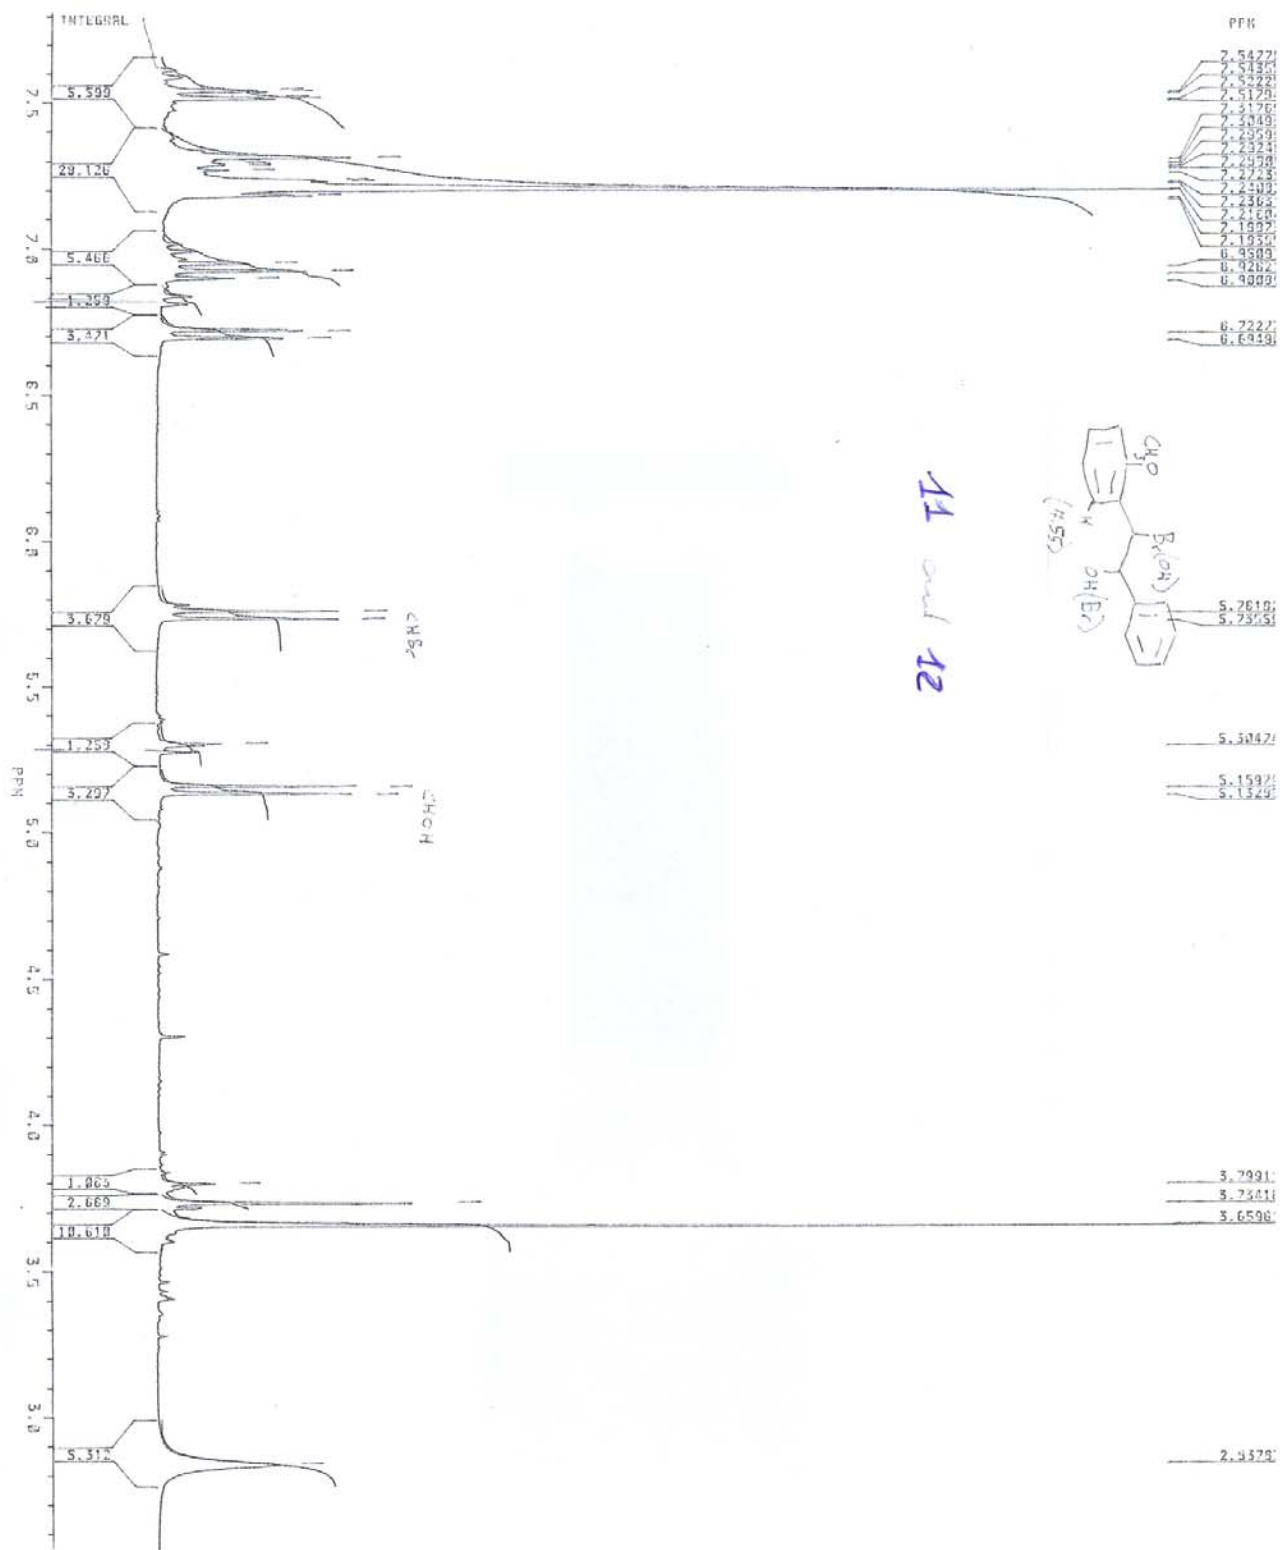

S1X

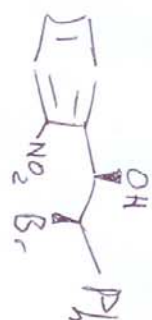

13

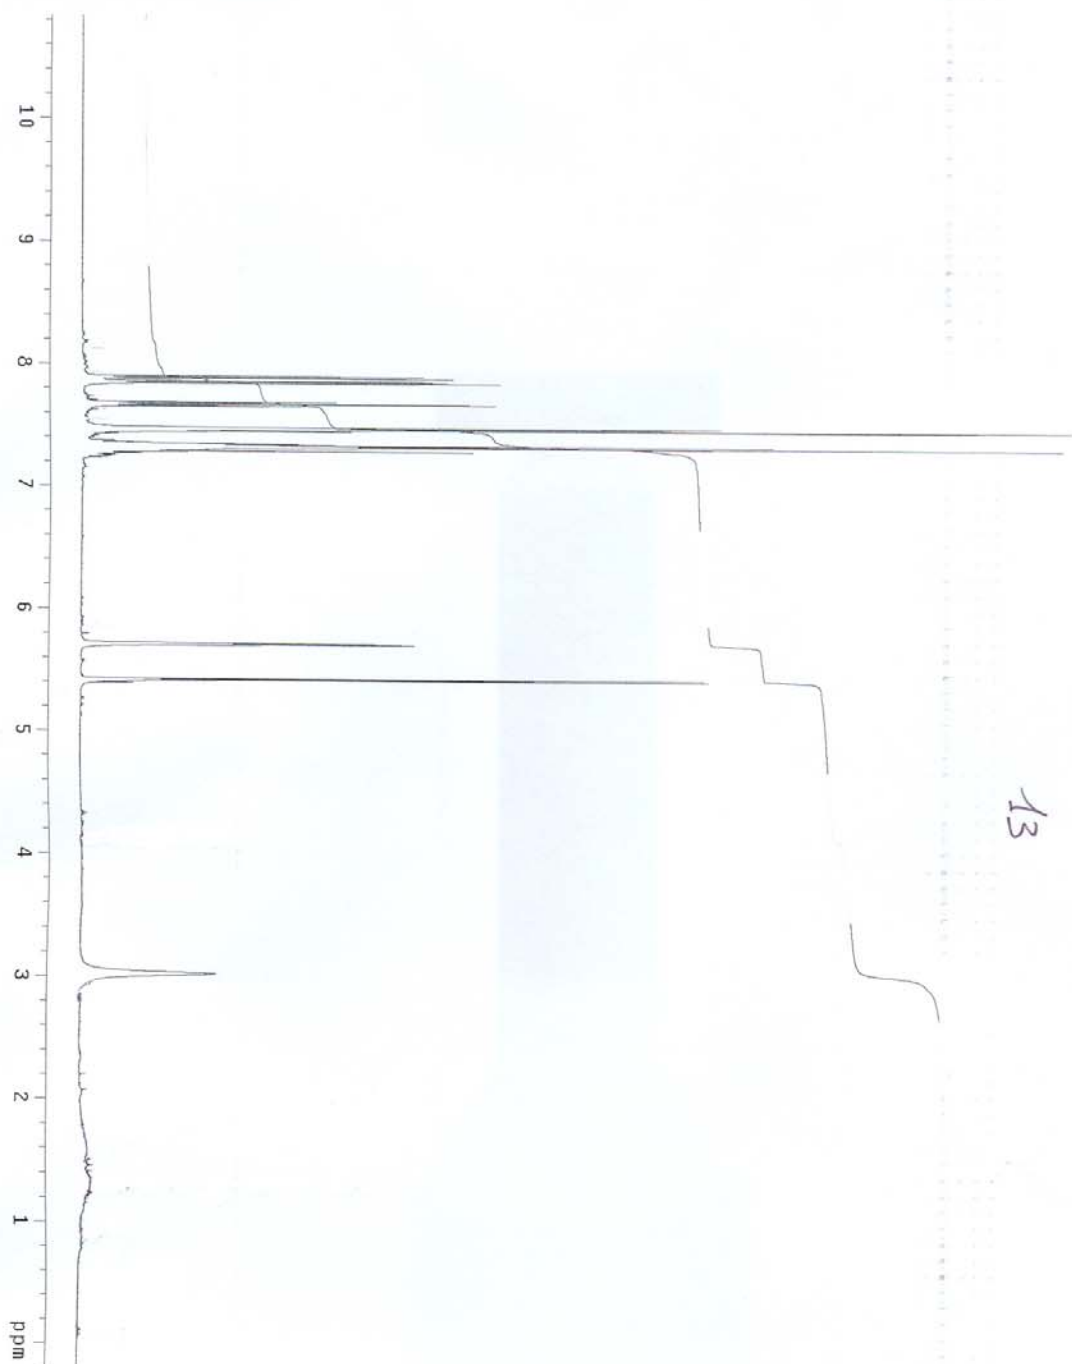

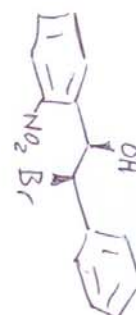

13

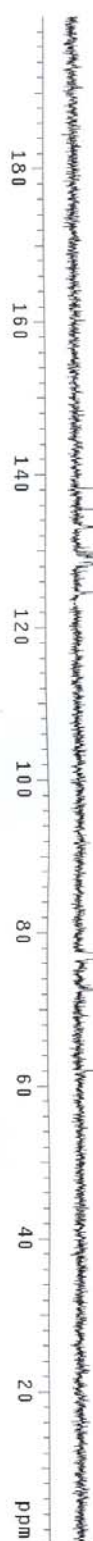

Geometry of structure 7a(H+)A

b3lyp/6-31g(d)

Sum of electronic and thermal Free Energies E=-820.560887(Hartree/Particle)

|   |             |             |             |
|---|-------------|-------------|-------------|
| H | 1.45495100  | 2.12756900  | 1.77615400  |
| C | 1.62786200  | 1.37471900  | 1.01132000  |
| C | 2.09555900  | -0.53398400 | -0.99318200 |
| C | 0.64299900  | 1.09363200  | 0.05411200  |
| C | 2.85114300  | 0.71207200  | 0.96669700  |
| C | 3.06072300  | -0.23238800 | -0.03598300 |
| C | 0.87234100  | 0.12842400  | -0.93790400 |
| H | 3.63940800  | 0.91996800  | 1.68010800  |
| H | 0.10822100  | -0.08381500 | -1.67892800 |
| H | 2.31012000  | -1.27454900 | -1.75407300 |
| C | -0.71434700 | 1.83625000  | 0.09020200  |
| H | -0.59340500 | 2.72972100  | 0.72616500  |
| N | 4.36056600  | -0.94260700 | -0.08595300 |
| O | 4.50949900  | -1.76990200 | -0.97940800 |
| O | 5.18778900  | -0.65236000 | 0.77182500  |
| C | -1.57428100 | 0.88299000  | 0.83191300  |
| H | -1.24779800 | 0.75871500  | 1.86354500  |
| C | -2.65622100 | 0.09952500  | 0.43475700  |
| C | -4.85700500 | -1.51694700 | -0.17242000 |
| C | -3.19871800 | -0.80356800 | 1.41308400  |
| C | -3.26668800 | 0.16398500  | -0.86448200 |
| C | -4.35162500 | -0.64077500 | -1.14956500 |
| C | -4.28299200 | -1.59876000 | 1.10873700  |
| H | -2.74086900 | -0.85300000 | 2.39703000  |
| H | -2.87243800 | 0.85439300  | -1.59756300 |
| H | -4.82120000 | -0.59482300 | -2.12658000 |
| H | -4.69222500 | -2.28051700 | 1.84667000  |
| H | -5.71308600 | -2.14217200 | -0.41128000 |
| O | -1.22812200 | 2.15926100  | -1.17247500 |
| H | -0.60145000 | 2.74971800  | -1.62283000 |

Geometry of structure 7a(H+)B

b3lyp/6-31g(d)

Sum of electronic and thermal Free Energies E=-820.554404 (Hartree/Particle)

|   |             |             |             |
|---|-------------|-------------|-------------|
| H | -3.93514200 | 0.26594900  | -1.89432500 |
| C | -3.72772500 | -0.18558900 | -0.92703100 |
| C | -3.22109100 | -1.31281000 | 1.59015600  |
| C | -2.74104400 | 0.36284000  | -0.08476800 |
| C | -4.46938500 | -1.27895500 | -0.49606500 |
| C | -4.21631600 | -1.84321900 | 0.76102900  |
| C | -2.46775000 | -0.22405900 | 1.16490600  |
| H | -5.24943100 | -1.68771000 | -1.13049500 |
| H | -1.69647100 | 0.19540200  | 1.80279000  |
| H | -3.03293900 | -1.75219900 | 2.56468600  |
| C | -1.95867200 | 1.63567100  | -0.52867100 |
| H | -2.54432900 | 2.16833400  | -1.28907800 |
| C | -0.89888500 | 0.83186000  | -1.14983300 |
| C | 0.40645600  | 0.50363300  | -0.70756300 |
| C | 3.01399100  | -0.16283500 | -0.05320000 |
| C | 1.13668000  | -0.43594300 | -1.49427900 |
| C | 1.03819300  | 1.10335200  | 0.42205400  |
| C | 2.34218900  | 0.76668300  | 0.74414000  |
| C | 2.43925700  | -0.77150600 | -1.17021600 |
| H | 0.66318700  | -0.89298700 | -2.35830400 |
| H | 0.49913300  | 1.83302100  | 1.01087500  |
| H | 2.85311400  | 1.20826600  | 1.59112500  |
| H | 3.01491400  | -1.48144500 | -1.75142100 |
| H | -4.79642300 | -2.69855800 | 1.09397600  |
| N | 4.41560300  | -0.52037300 | 0.30384100  |
| O | 4.88632900  | 0.02152300  | 1.29625900  |
| O | 4.97964800  | -1.32834400 | -0.42367000 |
| H | -1.20241100 | 0.38879600  | -2.09532800 |
| O | -1.52190800 | 2.46324000  | 0.50341000  |
| H | -2.29037100 | 2.90965000  | 0.89665700  |

Geometry of structure 7d(H+)A

b3lyp/6-31g(d) geom=connectivity

Sum of electronic and thermal Free Energies E=-730.571423 (Hartree/Particle)

|   |             |             |             |
|---|-------------|-------------|-------------|
| H | -1.57441300 | 2.19302900  | 1.83095600  |
| C | -1.73683700 | 1.41233800  | 1.09149300  |
| C | -2.17983100 | -0.56856400 | -0.84839700 |
| C | -0.78707100 | 1.20111700  | 0.06536200  |
| C | -2.89356500 | 0.66415400  | 1.13794900  |
| C | -3.13198900 | -0.33602100 | 0.16584400  |
| C | -1.01493700 | 0.18243500  | -0.87916800 |
| H | -3.64725100 | 0.83167500  | 1.89989800  |
| H | -0.28293300 | 0.00216800  | -1.66023600 |
| H | -2.34694000 | -1.32775100 | -1.60272000 |
| O | -4.28488500 | -0.99943400 | 0.29699000  |
| C | -4.63317900 | -2.02327300 | -0.64488500 |
| H | -4.70484000 | -1.61225000 | -1.65747000 |
| H | -5.60854800 | -2.38866600 | -0.32597300 |
| H | -3.90506800 | -2.84099700 | -0.61823700 |
| C | 0.48334700  | 2.07404100  | -0.01924700 |
| H | 0.32373900  | 3.00509300  | 0.54072000  |
| O | 0.98101600  | 2.29755500  | -1.30627800 |
| H | 0.35726000  | 2.86945000  | -1.78341500 |
| C | 1.27333800  | 1.11764800  | 0.77508200  |
| H | 1.03516000  | 1.15683500  | 1.83538700  |
| C | 2.23162400  | 0.15039700  | 0.39637300  |
| C | 4.22393100  | -1.74325200 | -0.14644600 |
| C | 2.78561300  | 0.04226100  | -0.91456300 |
| C | 2.71200300  | -0.72020800 | 1.42032200  |
| C | 3.69610100  | -1.65370600 | 1.14953800  |
| C | 3.76959000  | -0.89714400 | -1.16991900 |
| H | 2.44262900  | 0.71213700  | -1.69159800 |
| H | 2.29709400  | -0.64066100 | 2.42139900  |
| H | 4.05892000  | -2.31034900 | 1.93344900  |
| H | 4.19813800  | -0.97435700 | -2.16400200 |
| H | 4.99917200  | -2.47365800 | -0.35988800 |



Geometry of structure 7d(H+)B

b3lyp/6-31g(d)

Sum of electronic and thermal Free Energies E=-730.583531 (Hartree/Particle)

|   |             |             |             |
|---|-------------|-------------|-------------|
| H | 1.27297500  | -0.92952400 | 2.22905900  |
| C | 1.67247600  | -0.46060300 | 1.33411600  |
| C | 2.65965800  | 0.77261800  | -0.98745300 |
| C | 0.82308700  | 0.42629700  | 0.58054600  |
| C | 2.96063200  | -0.72792300 | 0.95400100  |
| C | 3.47357100  | -0.11169800 | -0.22175100 |
| C | 1.37652400  | 1.04013500  | -0.60376000 |
| H | 3.57598300  | -1.39834000 | 1.54120800  |
| H | 0.75896200  | 1.72144200  | -1.17302700 |
| H | 3.09702900  | 1.22523900  | -1.87081500 |
| O | 4.69386900  | -0.29308700 | -0.68334100 |
| C | 5.63226200  | -1.15721700 | -0.00465300 |
| H | 5.83196000  | -0.78216900 | 1.00284200  |
| H | 6.53836700  | -1.11512000 | -0.60626400 |
| H | 5.24967400  | -2.18099200 | 0.02823800  |
| C | -0.45793400 | 0.63874400  | 1.05784200  |
| H | -0.71896100 | 0.12404400  | 1.98132000  |
| C | -1.60588200 | 1.41071100  | 0.51197400  |
| H | -2.01854300 | 2.00077200  | 1.34870200  |
| O | -1.22433100 | 2.24124900  | -0.55890300 |
| H | -2.02936900 | 2.61675100  | -0.95161100 |
| C | -2.64434900 | 0.33771600  | 0.13670200  |
| C | -4.52076000 | -1.60742100 | -0.56240200 |
| C | -3.72028900 | 0.06449300  | 0.99049300  |
| C | -2.49918400 | -0.37774000 | -1.06081200 |
| C | -3.44421700 | -1.34008100 | -1.41219500 |
| C | -4.65810500 | -0.90514900 | 0.63815200  |
| H | -3.83871400 | 0.62283100  | 1.91635400  |
| H | -1.66449200 | -0.16265000 | -1.72176300 |
| H | -3.33990200 | -1.88293400 | -2.34685000 |
| H | -5.50140300 | -1.10295300 | 1.29286500  |
| H | -5.25480100 | -2.35898900 | -0.83711200 |
